# Supplementary material
Source: Springer Nature journal article supplement (https://www.springermedizin.de/resource/supplementary/12889_2012_4362_MOESM2_ESM.pdf/9492078)
Supplement: MOESM2 [file 9492078]

## Screening

Assessed for eligibility (n=34)

Excluded (n=2)

- Declined to participate (n=2)

Did not meet eligibility  
critieria—not discharged home  
(n=2)

Enrolled (n=32)

## Allocation

Intervention Arm (n=20);  
◆ Received intervention (n=19)  
◆ Lost to follow-up prior to intervention (n=1)

Control arm (n=10);

## 3-month Follow-up

Intervention (n=17)  
First 10 subjects also have proxy  
respond to questionnaire  
Patients withdrew participation (n=2)

Control arm (n=8)  
First 5 subjects also have proxy  
respond to questionnaire  
Patients lost to follow-up (n=2)

Completed with  
proxy (n=9)

Completed with  
proxy (n=5)
